# Supplementary material for: Protein Aggregation Patterns Inform about Breast Cancer Response to Antiestrogens and Reveal the RNA Ligase RTCB as Mediator of Acquired Tamoxifen Resistance
Source: MDPI journal article supplement (doi:10.3390/cancers13133195), 2021-06-26

In Figure S1

XBP1S 3H

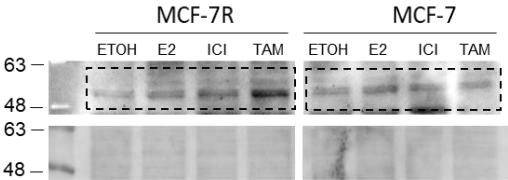

XBP1S 12H

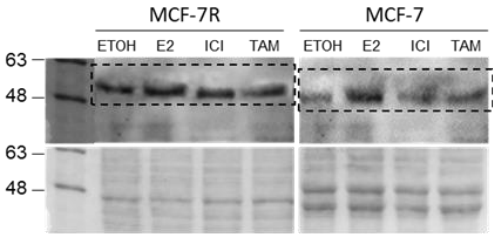

XBP1u 3H

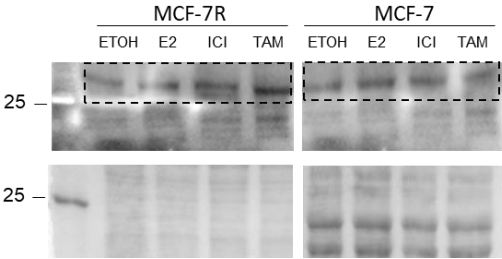

XBP1u 12H

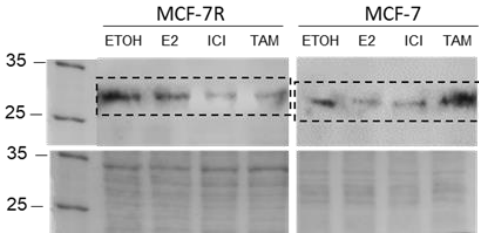

PERK 3H

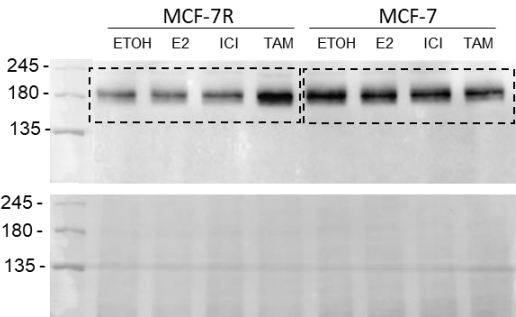

PERK 12H

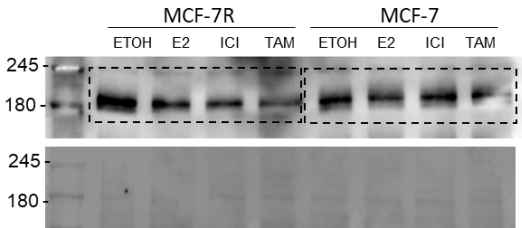

p-PERK 3H

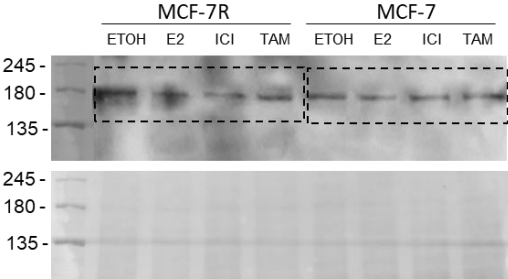

p-PERK 12H

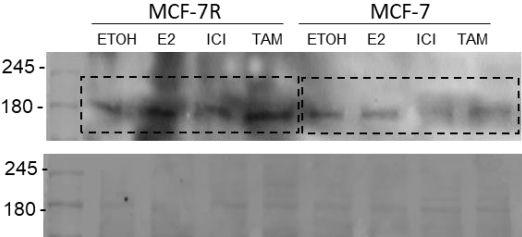

EIF2α 3H

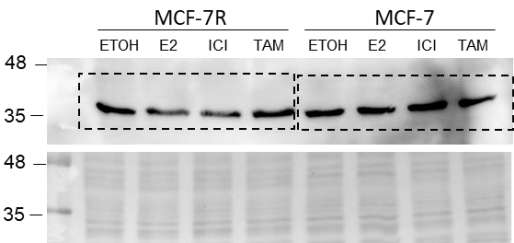

EIF2α 12H

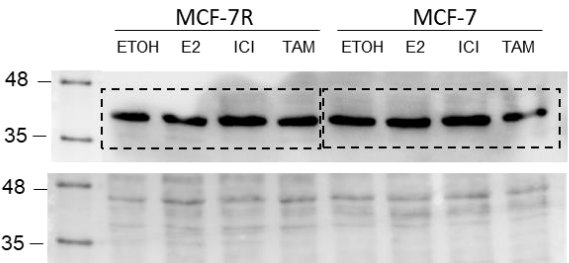

p-EIF2α 3H

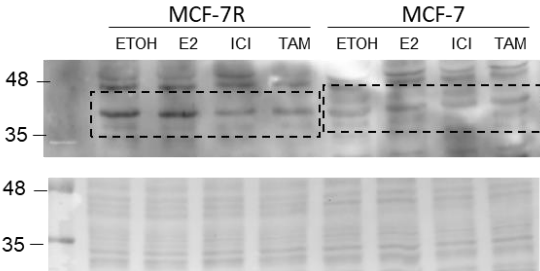

p-EIF2α 12H

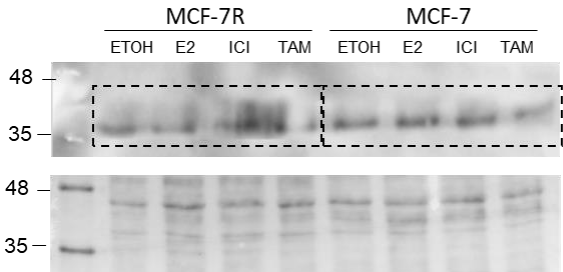

In Figure 3 B

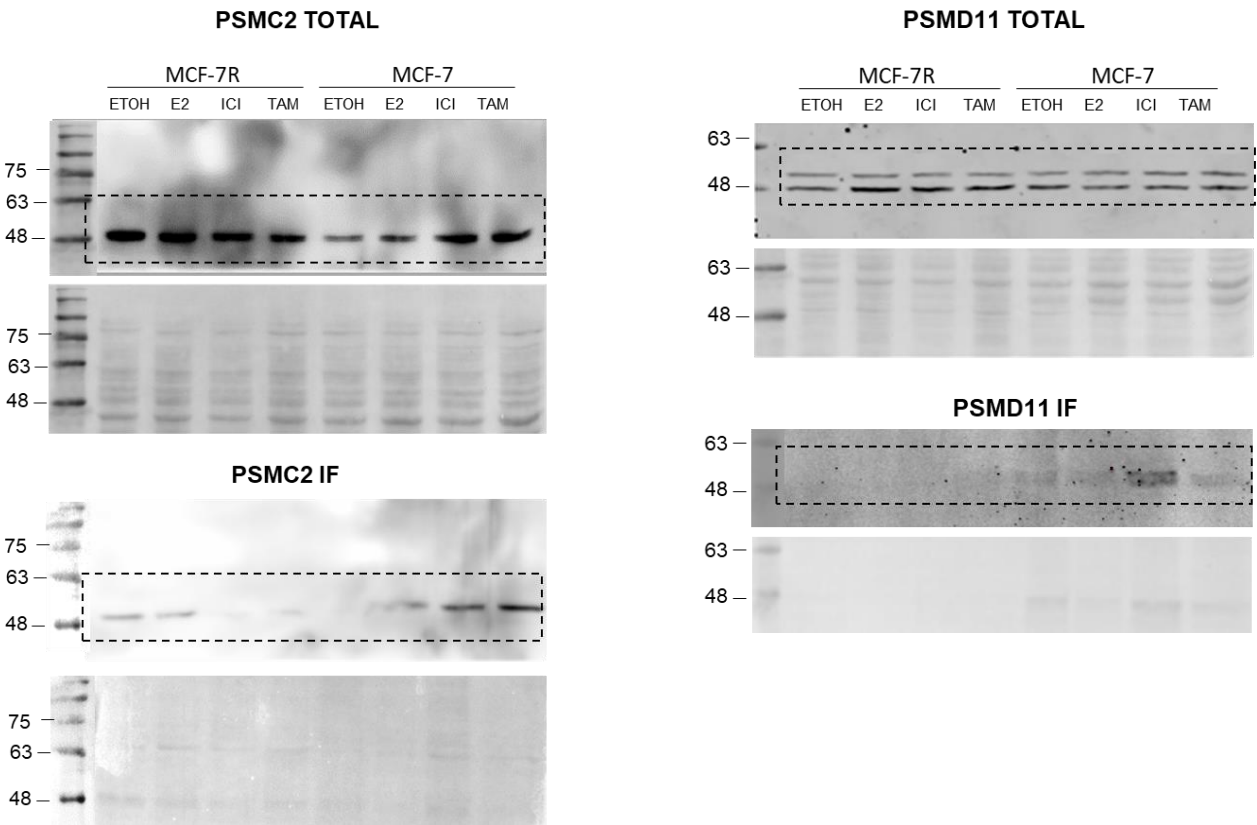

In Figure 3 C

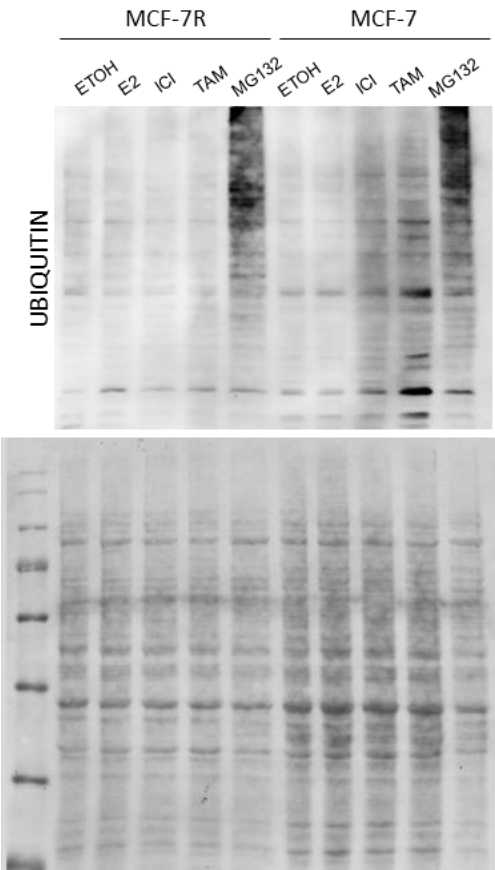

In Figure 3 D

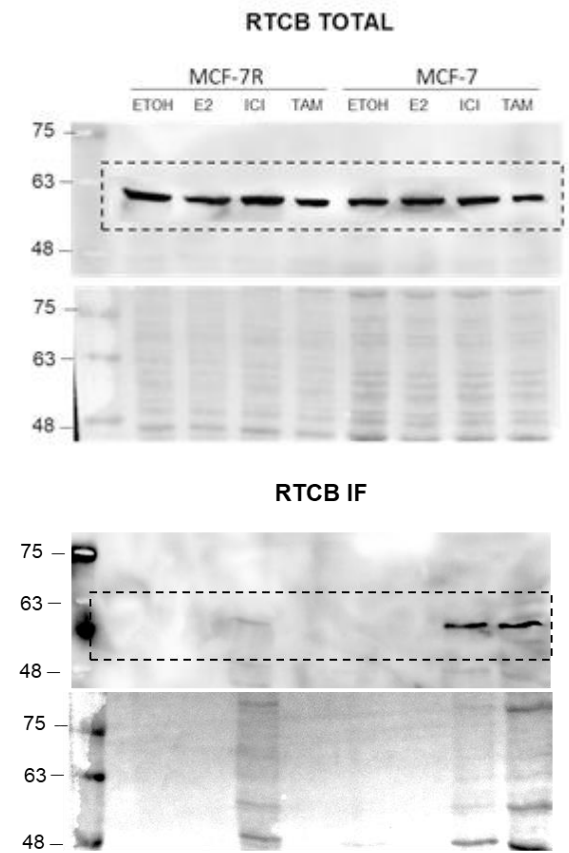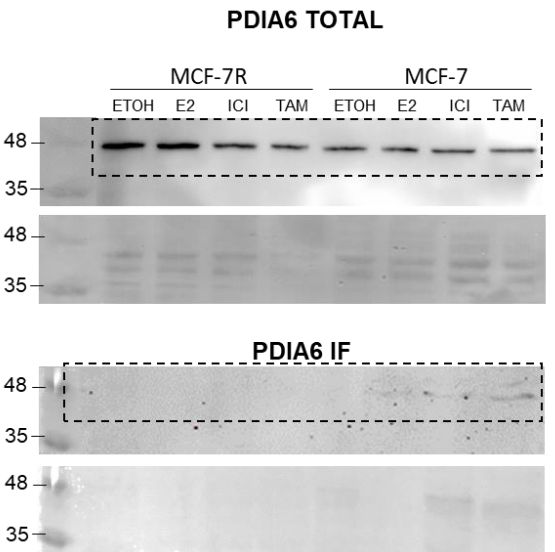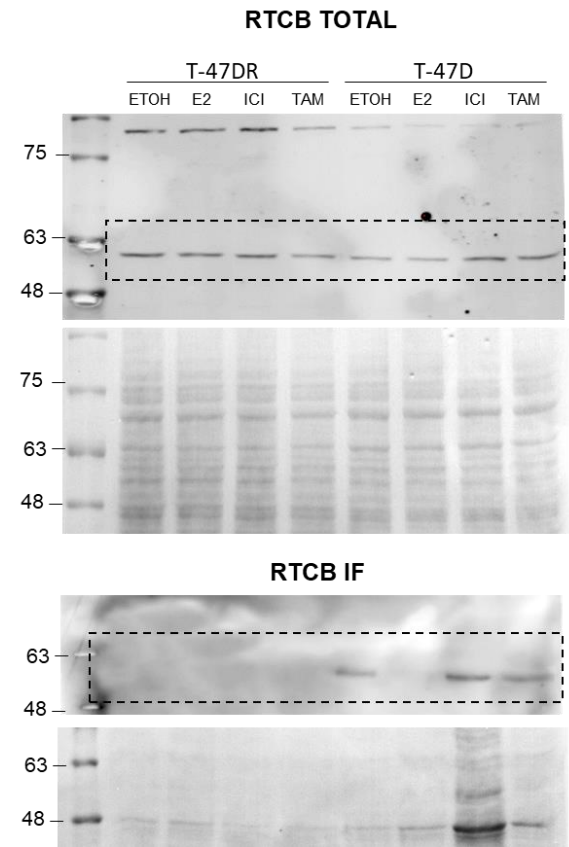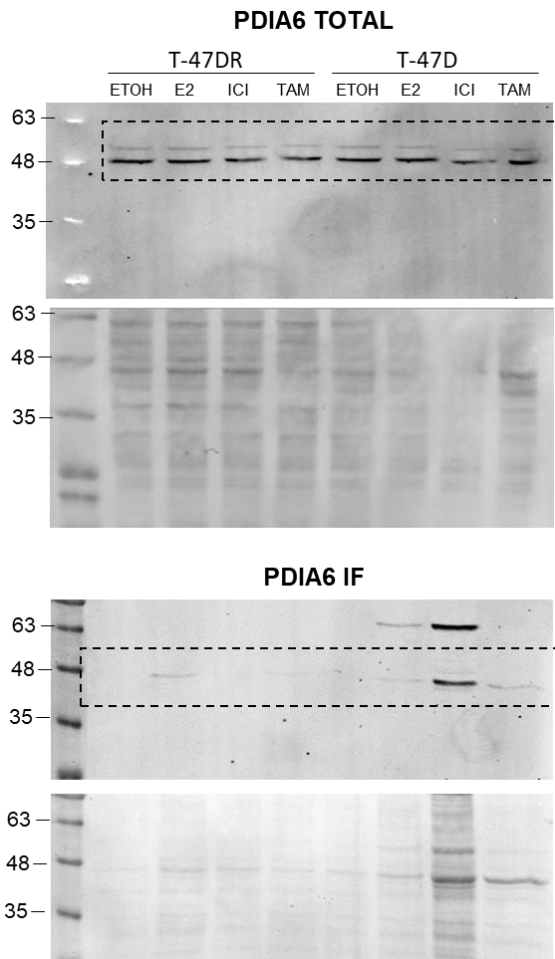

In Figure 4B

**XBP1S**

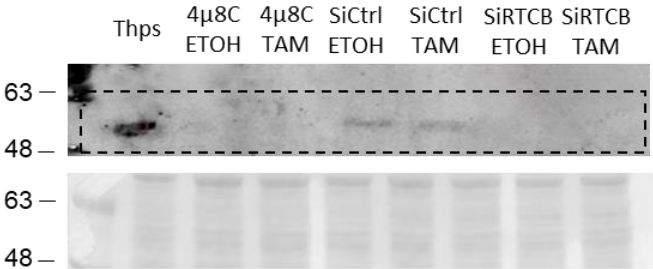

**BIP**

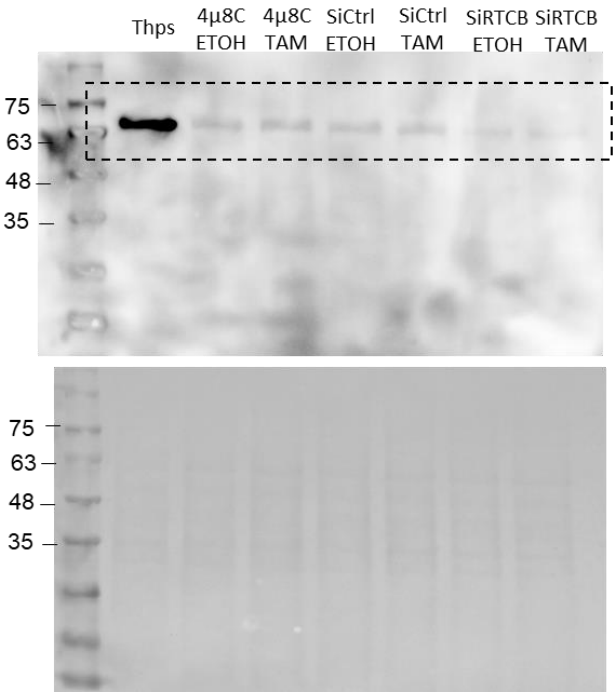

**XBP1u**

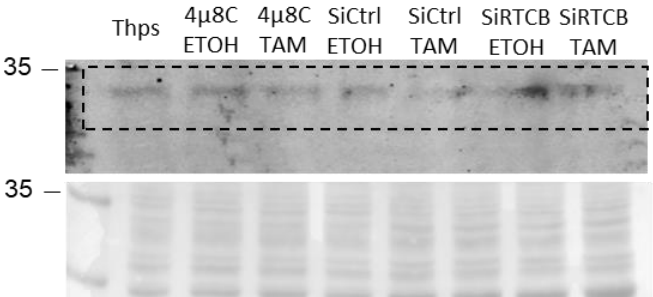

**RTCB**

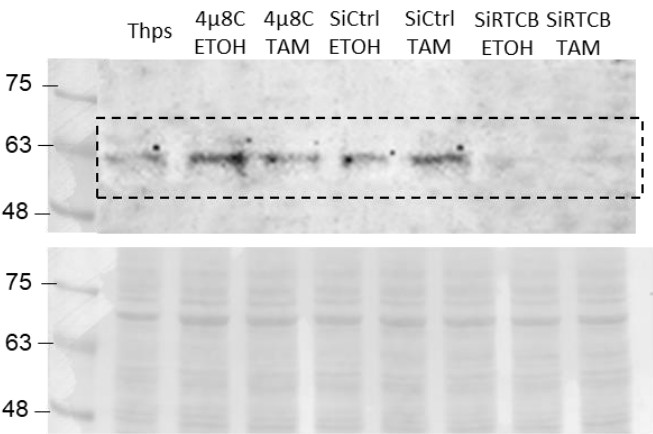

In Figure S1

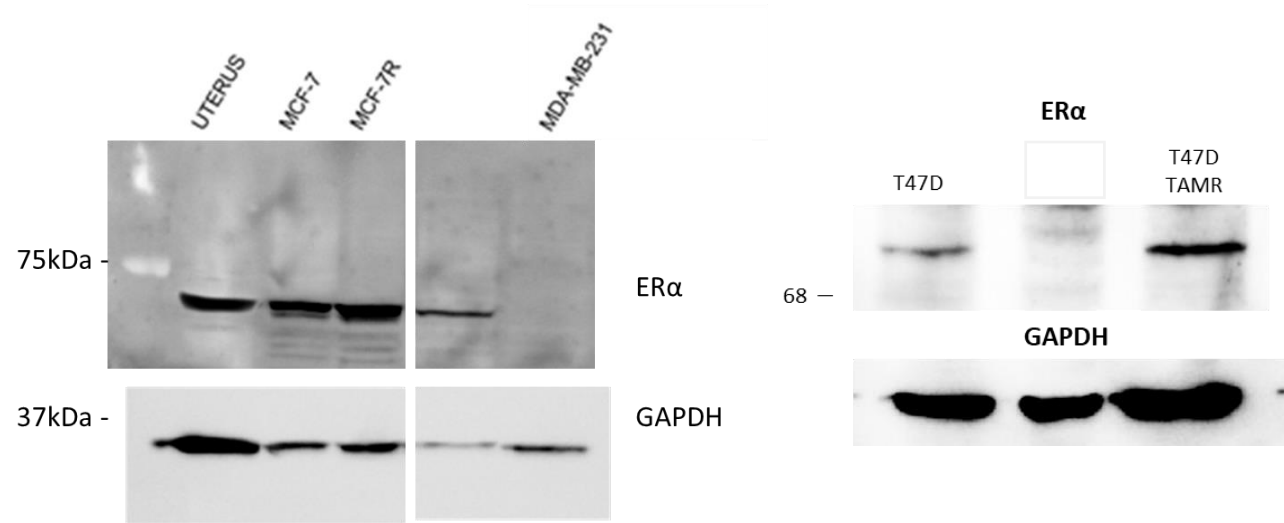

In Figure 4

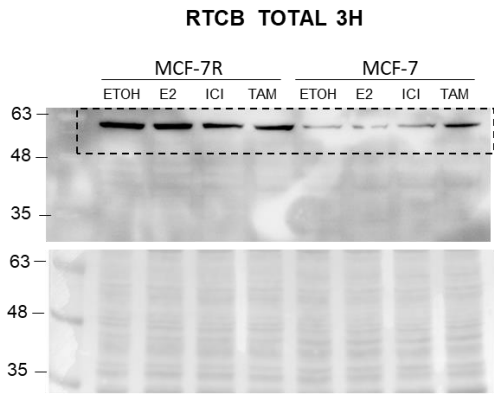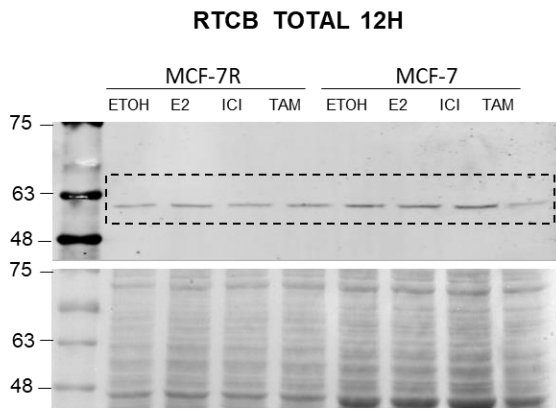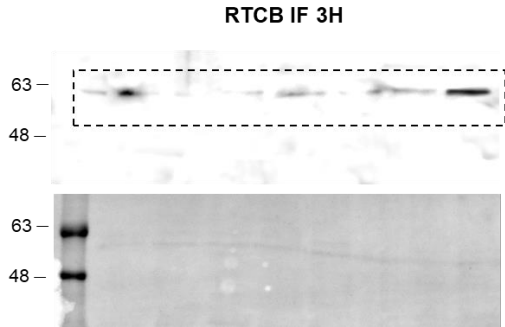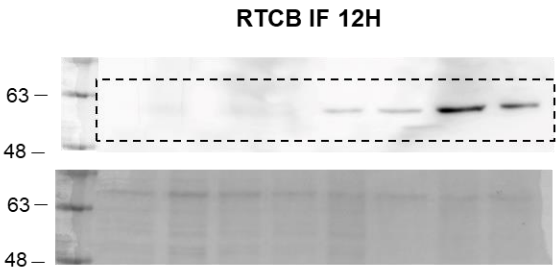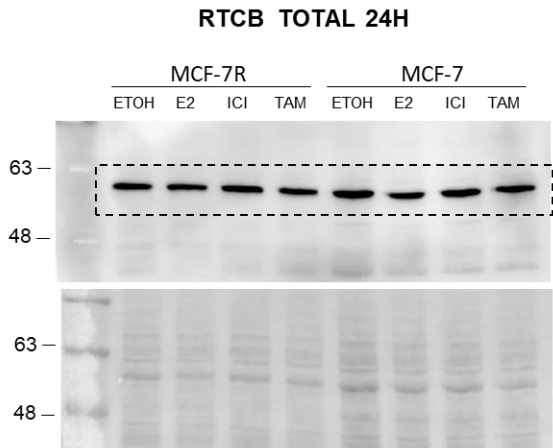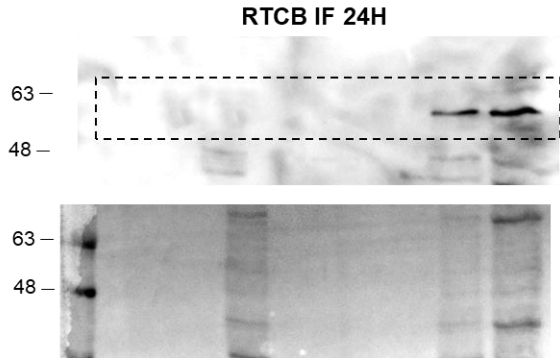

Supplement: s1 [file s1]
