# Supplementary material for: Protein Aggregation Patterns Inform about Breast Cancer Response to Antiestrogens and Reveal the RNA Ligase RTCB as Mediator of Acquired Tamoxifen Resistance
Source: MDPI journal article supplement (doi:10.3390/cancers13133195), 2021-06-26
Supplement: s1 [file s1]

## Supplementary files

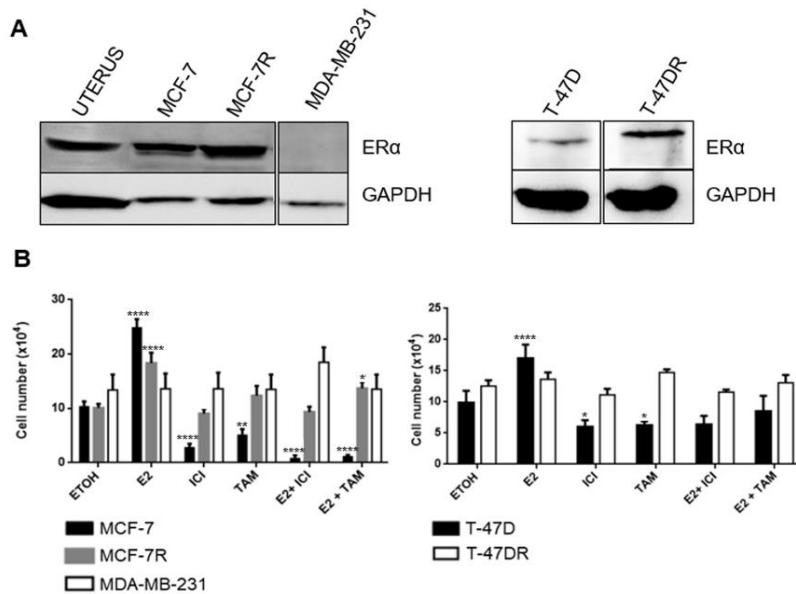

**Figure S1.** Estrogen receptor expression and response to antiestrogenic treatment of MCF-7, MCF-7R, T-47D, T-47DR and MDA-MB-231 cell lines. **(A)** Western blot showing ER $\alpha$  expression in different cell lines that were generated for this work. All the lanes presented correspond to samples separated in the same gel, the vertical lines indicate that the digital image was cut to show lanes side-by-side. The blots are representative of two independent experiments. **(B)** Cell number evaluated following 5 days of treatment with 10 nM E2, 250 nM ICI, 500 nM TAM, 10 nM E2+250 nM ICI or 10 nM E2+500 nM TAM or the control consisting of same volume of ethanol (ETOH). \*\*\*\* $p < 0.0001$ , \*\*\* $p < 0.001$ , \*\* $p < 0.01$  and \* $p < 0.05$  vs. ETOH in the same cell line, non-parametric t test.

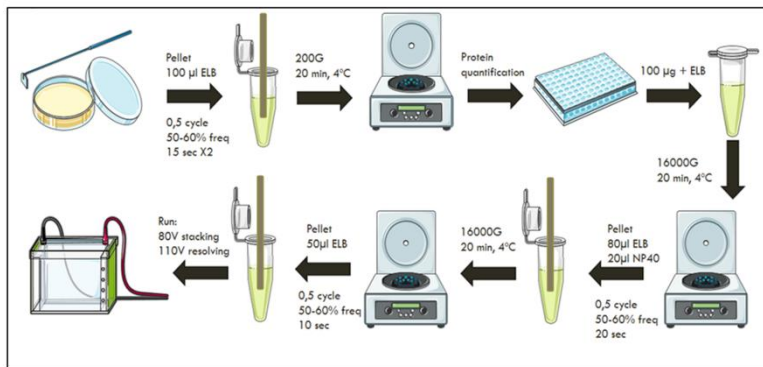

**Figure S2.** Schematic representation of the insoluble fraction recovery protocol used in this study. Cells were harvested in ELB lysis buffer, sonicated, centrifuged and kept on ice while total protein was measured using a standard BSA assay. For insoluble protein fraction isolation 100  $\mu$ g of total protein were diluted in 100  $\mu$ L ELB buffer and centrifuged at 16,000G for 20 min, 4  $^{\circ}$ C to separate cytosolic soluble proteins. The supernatant containing cytosolic soluble proteins was discarded, and the pellet was resuspended in 80  $\mu$ L ELB buffer + 20  $\mu$ L NP40. After sonication, the solution was centrifuged at 16,000G for 20 min, 4  $^{\circ}$ C to allow the solubilization and separation of membrane proteins. The supernatant was discarded. For SDS-Page electrophoresis the pellet enriched in detergent insoluble proteins was resuspended in 50  $\mu$ L ELB buffer and for Western blot hybridization the pellet was resuspended in 20  $\mu$ L ELB buffer and a sonication step was performed. The total protein and insoluble protein extracts were stored at -80  $^{\circ}$ C until use.

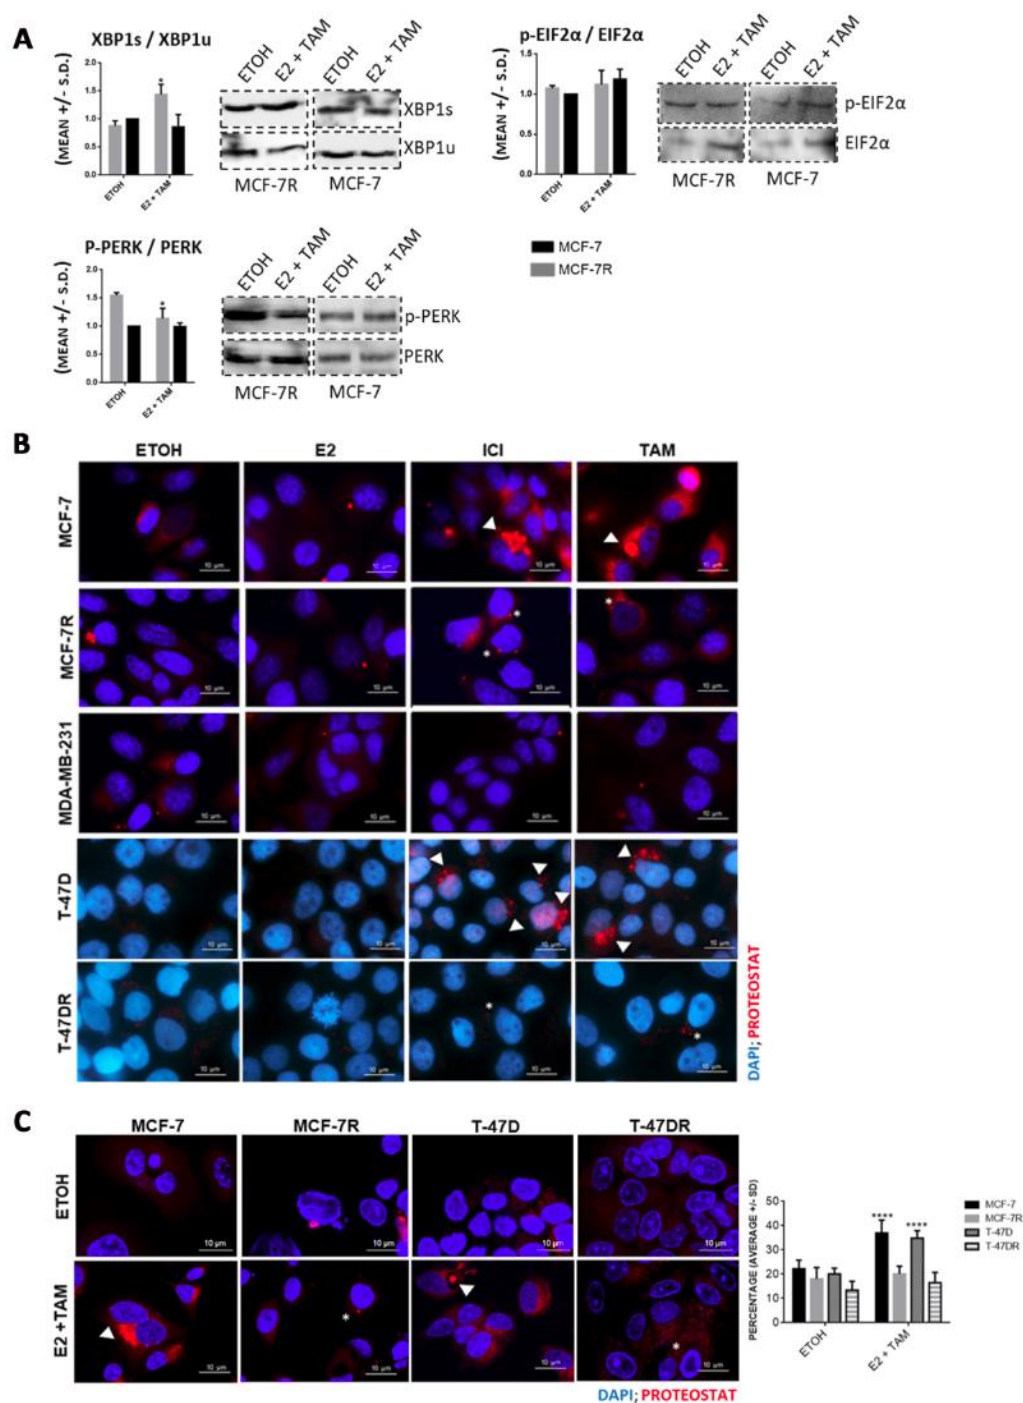

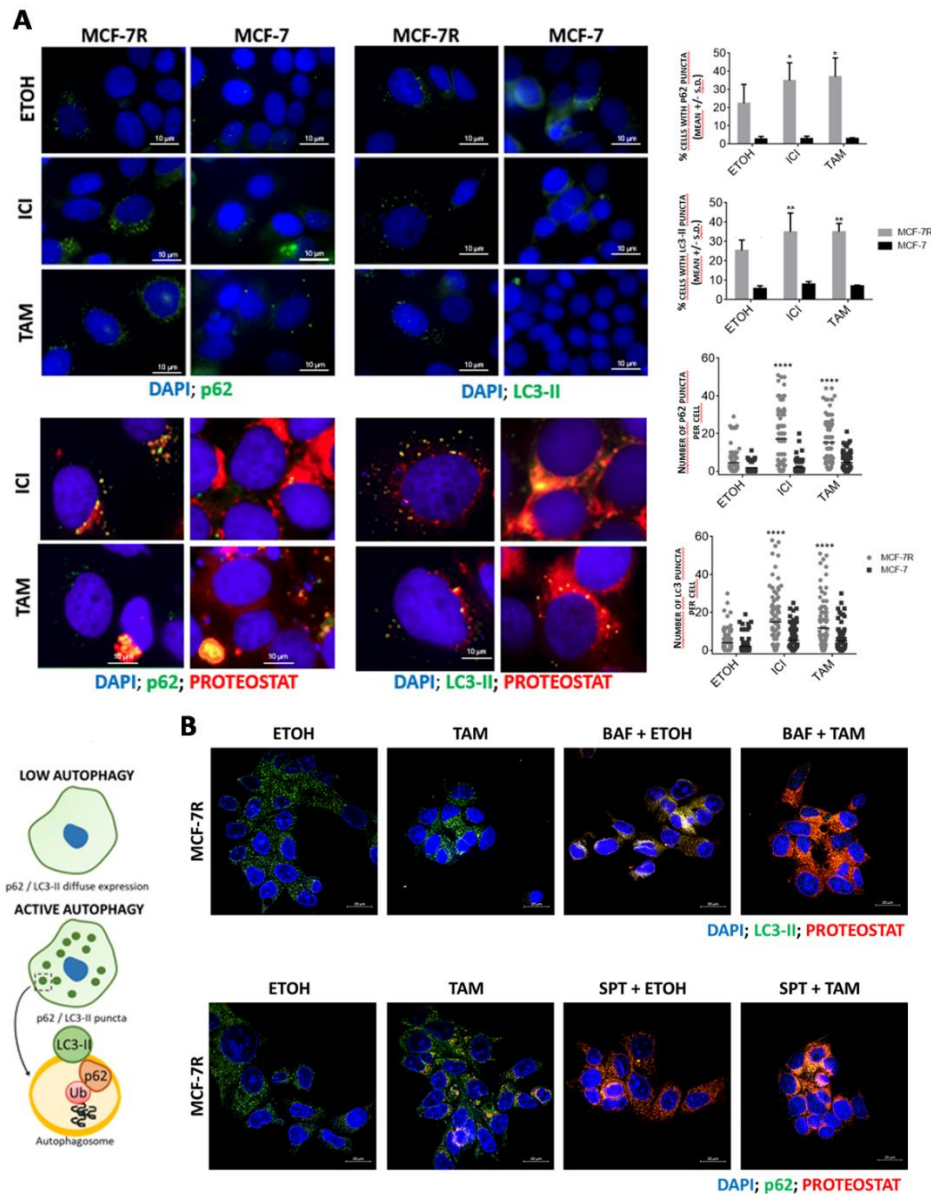

**Figure S4.** Correlation between autophagy activation and aggresome accumulation following antiestrogen treatment. **A.** MCF-7 and MCF-7R cells were treated with 250 nM ICI, 500 nM TAM or same volume of ETOH (control) for 24h. Subcellular localization of p62 and LC3-II is schematically represented in the cartoon. In a state of low autophagy, p62 (a cargo recognition protein that targets ubiquitinated protein to degradation) and LC3-II (an autophagosome membrane protein) localization is diffuse throughout the cytoplasm. On the other hand, p62/LC3-II puncta expression is a characteristic of active autophagy and can be seen in higher number in MCF-7R cells. The lower panels show p62 and LC3-II co-localization with protein aggregates labelled with ProteoStat®. The pictures depict clear differences in the autophagic patterns between MCF-7 and MCF-7R cells in response to treatment as well as lower co-localization of autophagic markers with aggresomes in MCF-7 cells. N=6000 cells analyzed. In all graphs  $****p < 0.0001$ ,  $***p < 0.001$ ,  $**p < 0.01$ ,  $*p < 0.05$  vs. same cell line ETOH, non-parametric t test. **B.** MCF-7R were co-incubated with 500 nM tamoxifen (TAM) and 1 $\mu$ M of Bafilomycin (lysosomal inhibitor) or 1 $\mu$ M Spautin-1 (USP10 and USP13 inhibitor) for 8h. Inhibition of autophagy increased protein aggregation and co-localization of LC3-II or p62 with aggresomes.

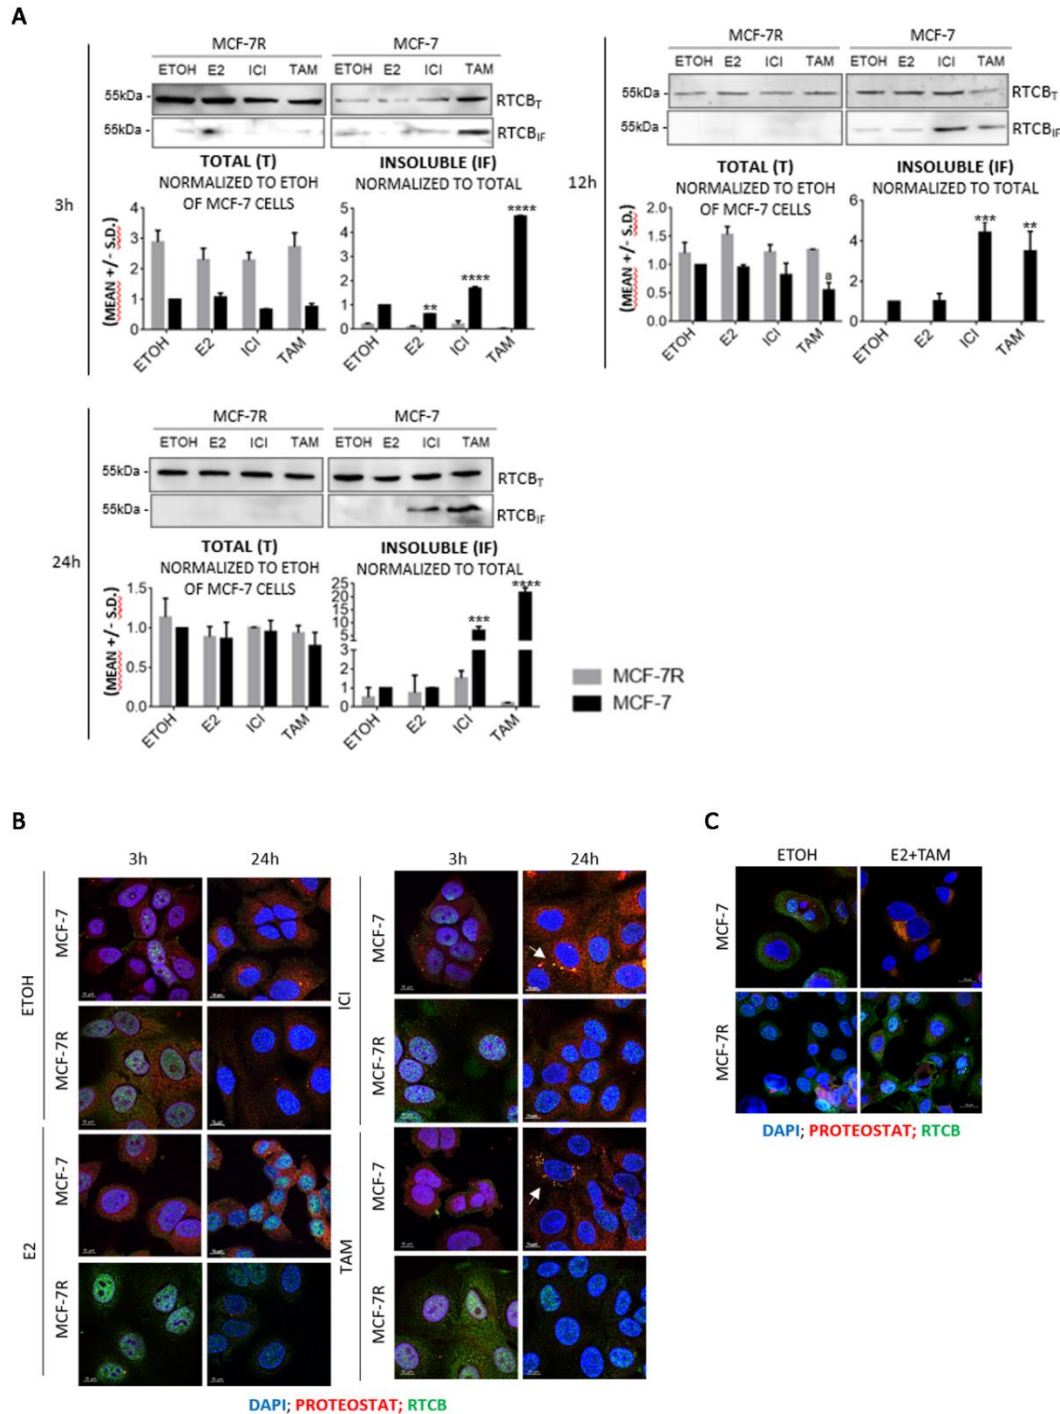



**Table S1.** Clinicopathological data of the patient cohort.

| Case | Age at diagnosis | Histological type | Grade | Stage | Molecular subtype     | Adjuvant Treatment                 | Years until metastasis | Metastasis topography | Disease course                                                                                  | Vital Status       |
|------|------------------|-------------------|-------|-------|-----------------------|------------------------------------|------------------------|-----------------------|-------------------------------------------------------------------------------------------------|--------------------|
| 1    | 36               | Mixed             | 2     | III   | Luminal B-like, HER2+ | CT + RT + Exemestane + Trastuzumab | 10                     | Brain                 | Disease progression, under endocrine treatment (skin, bone metastases)                          | Dead of disease    |
| 2    | 51               | Ductal            | 2     | II    | Luminal-like, HER2-   | CT + RT + Anastrozole              | 3                      | Liver                 | Disease progression (bone metastases)                                                           | Dead of disease    |
| 3    | 56               | Ductal            | 3     | II    | Luminal-like, HER2-   | CT + RT + Anastrozole              | 8                      | Skin                  | Disease progression (bone metastases)                                                           | Dead of disease    |
| 4    | 43               | Ductal            | 2     | III   | Luminal B-like, HER2+ | CT + RT + Tamoxifen + Trastuzumab  | 5                      | Lung                  | Disease progression, under endocrine treatment (pleural and bone metastases)                    | Dead of disease    |
| 5    | 56               | Ductal            | 2     | II    | Luminal B-like        | CT + RT + Letrozol                 | 19                     | Lung                  | Disease progression, under endocrine treatment (bone)                                           | Alive with disease |
| 6    | 35               | Ductal            | 2     | III   | Luminal B-like, HER2+ | CT + RT + Tamoxifen + Trastuzumab  | 5                      | Lung                  | Disease progression, under endocrine treatment (bone, mediastinal)                              | Dead of disease    |
| 7    | 41               | Mixed             | 2     | II    | Luminal-like, HER2-   | CT + RT + Tamoxifen                | 9                      | Lung                  | Disease progression, under endocrine treatment (lung metastases)                                | Dead of disease    |
| 8    | 48               | Ductal            | 3     | III   | Luminal B-like, HER2- | CT + RT + Tamoxifen                | 10                     | Lung                  | Disease progression, under endocrine treatment (bone metastases)                                | Alive with disease |
| 9    | 58               | Ductal            | 3     | II    | Luminal B-like, HER2+ | CT + Anastrozole + Trastuzumab     | 6                      | Lung                  | Disease progression, under endocrine treatment (bone, brain metastases)                         | Alive with disease |
| 10   | 74               | Ductal            | 2     | I     | Luminal-like, HER2-   | CT + RT + Tamoxifen                | 9                      | Lung                  | Disease progression, under endocrine treatment (bone, liver metastases)                         | Dead of disease    |
| 11   | 49               | Ductal            | 2     | II    | Luminal-like, HER2-   | CT + RT + Tamoxifen                | 12                     | Lung                  | Disease progression (pleural metastases, elevated CA15.3)                                       | Alive with disease |
| 12   | 59               | Ductal            | 3     | N/A   | Luminal-like, HER2+   | CT + RT + Tamoxifen                | 6                      | Pleural               | Disease progression, under endocrine treatment (bone, skin, lymph-node metastases)              | Dead of disease    |
| 13   | 67               | Lobular           | 2     | II    | Luminal-like, HER2-   | CT + RT + Anastrozole              | 8                      | Pleural               | Disease progression (bone metastases)                                                           | Dead of disease    |
| 14   | 68               | Lobular           | 2     | II    | Luminal-like, HER2-   | CT + RT + Tamoxifen + Exemestane   | 8                      | Pleural               | Disease progression, under endocrine treatment (bone, liver metastases)                         | Dead of disease    |
| 15   | 44               | Ductal            | 3     | III   | Luminal-like, HER2-   | CT + RT + Tamoxifen                | 5                      | Pleural               | Disease progression, under endocrine treatment (bone, brain, liver, lymph-node metastases)      | Dead of disease    |
| 16   | 45               | Ductal            | 2     | III   | Luminal-like, HER2-   | CT + RT + Tamoxifen                | 5                      | Pleural               | Disease progression (bone, lymph-node, liver, skin metastases)                                  | Dead of disease    |
| 17   | 50               | Ductal            | 2     | I     | Luminal-like, HER2-   | CT + RT + Tamoxifen + Exemestane   | 7                      | Pleural               | Disease progression, under endocrine treatment (bone metastases)                                | Dead of disease    |
| 18   | 66               | Ductal            | 3     | III   | Luminal-like, HER2+   | CT + Anastrozole + Trastuzumab     | 2                      | Pleural               | Disease progression (lung metastases)                                                           | Dead of disease    |
| 19   | 54               | Ductal            | 3     | I     | Luminal-like, HER2-   | CT + Anastrozole                   | 5                      | Pleural               | Disease progression, under endocrine treatment (lung, pericardium, bone, lymph-node metastases) | Dead of disease    |
| 20   | 51               | Lobular           | 2     | I     | Luminal-like, HER2-   | CT + Tamoxifen                     | 2                      | Pleural               | Disease progression, under endocrine treatment (bone, liver metastases)                         | Dead of disease    |

|    |    |         |   |     |                     |                       |   |         |                                             |                                 |
|----|----|---------|---|-----|---------------------|-----------------------|---|---------|---------------------------------------------|---------------------------------|
| 21 | 52 | Lobular | 2 | III | Luminal-like, HER2- | CT + RT + Anastrozole | 3 | Pleural | Disease progression (lung, bone metastases) | Dead of disease                 |
| 22 | 69 | Ductal  | 3 | III | Luminal-like, HER2- | CT + RT + Anastrozole | 4 | Pleural | N/A                                         | Died of stage IV gastric cancer |

**Table S2.** Proteins found uniquely aggregated in MCF-7R cells following 24h incubation with 4OH-tamoxifen (TAM) or Fulvestrant (ICI).

| TAM or ICI  |             |                                                           |  |  |  |  |                                                   |  |  |  |
|-------------|-------------|-----------------------------------------------------------|--|--|--|--|---------------------------------------------------|--|--|--|
| Uniprot IDs | Entry name  | Protein name                                              |  |  |  |  | Gene names                                        |  |  |  |
| Q9HCC0      | MCCB_HUMAN  | Methylcrotonoyl-CoA carboxylase beta chain, mitochondrial |  |  |  |  | MCCC2; MCCB                                       |  |  |  |
| Q15907      | RB11B_HUMAN | Ras-related protein Rab-11B                               |  |  |  |  | RAB11B; YPT3                                      |  |  |  |
| P02545      | LMNA_HUMAN  | Prelamin-A/C                                              |  |  |  |  | LMNA; LMN1                                        |  |  |  |
| P61313      | RL15_HUMAN  | 60S ribosomal protein L15                                 |  |  |  |  | RPL15; EC45; TCBAP0781                            |  |  |  |
| P46783      | RS10_HUMAN  | 40S ribosomal protein S10                                 |  |  |  |  | RPS10                                             |  |  |  |
| P23284      | PPIB_HUMAN  | Peptidyl-prolyl cis-trans isomerase B                     |  |  |  |  | PPIB; CYPB                                        |  |  |  |
| Q07020      | RL18_HUMAN  | 60S ribosomal protein L18                                 |  |  |  |  | RPL18                                             |  |  |  |
| Q9NVI7      | ATD3A_HUMAN | ATPase family AAA domain-containing protein 3A            |  |  |  |  | ATAD3A                                            |  |  |  |
| Q03252      | LMNB2_HUMAN | Lamin-B2                                                  |  |  |  |  | LMNB2; LMN2                                       |  |  |  |
| P61247      | RS3A_HUMAN  | 40S ribosomal protein S3a                                 |  |  |  |  | RPS3A; FTE1; MFTL                                 |  |  |  |
| P61978      | HNRPK_HUMAN | Heterogeneous nuclear ribonucleoprotein K                 |  |  |  |  | HNRNPK; HNRPK                                     |  |  |  |
| P62906      | RL10A_HUMAN | 60S ribosomal protein L10a                                |  |  |  |  | RPL10A; NEDD6                                     |  |  |  |
| P62424      | RL7A_HUMAN  | 60S ribosomal protein L7a                                 |  |  |  |  | RPL7A; SURF-3; SURF3                              |  |  |  |
| P04899      | GNAI2_HUMAN | Guanine nucleotide-binding protein G(i) subunit alpha-2   |  |  |  |  | GNAI2; GNAI2B                                     |  |  |  |
| Q96QK1      | VPS35_HUMAN | Vacuolar protein sorting-associated protein 35            |  |  |  |  | VPS35; MEM3; TCCCTA00141                          |  |  |  |
| P48729      | KC1A_HUMAN  | Casein kinase I isoform alpha                             |  |  |  |  | CSNK1A1                                           |  |  |  |
| P62753      | RS6_HUMAN   | 40S ribosomal protein S6                                  |  |  |  |  | RPS6; OK/SW-cl.2                                  |  |  |  |
| Q9BQ70      | TCF25_HUMAN | Transcription factor 25                                   |  |  |  |  | TCF25; KIAA1049; NULP1; FKSG26                    |  |  |  |
| P62241      | RS8_HUMAN   | 40S ribosomal protein S8                                  |  |  |  |  | RPS8; OK/SW-cl.83                                 |  |  |  |
| P40429      | RL13A_HUMAN | 60S ribosomal protein L13a                                |  |  |  |  | RPL13A                                            |  |  |  |
| P78527      | PRKDC_HUMAN | DNA-dependent protein kinase catalytic subunit            |  |  |  |  | PRKDC; HYRC HYRC1                                 |  |  |  |
| Q14204      | DYHC1_HUMAN | Cytoplasmic dynein 1 heavy chain 1                        |  |  |  |  | DYNC1H1; DHC1; DNCH1; DNCL; DNECL; DYHC; KIAA0325 |  |  |  |
| Q9HCE1      | MOV10_HUMAN | Helicase MOV-10                                           |  |  |  |  | MOV10; KIAA1631                                   |  |  |  |
| Q14151      | SAFB2_HUMAN | Scaffold attachment factor B2                             |  |  |  |  | SAFB2; KIAA0138                                   |  |  |  |
| P56192      | SYMC_HUMAN  | Methionine--tRNA ligase, cytoplasmic                      |  |  |  |  | MARS1; MARS                                       |  |  |  |
| P46940      | IQGA1_HUMAN | Ras GTPase-activating-like protein IQGAP1                 |  |  |  |  | IQGAP1; KIAA0051                                  |  |  |  |
| Q8IY81      | SPB1_HUMAN  | pre-rRNA 2'-O-ribose RNA methyltransferase FTSJ3          |  |  |  |  | FTSJ3; SB92                                       |  |  |  |
| P33992      | MCM5_HUMAN  | DNA replication licensing factor MCM5                     |  |  |  |  | MCM5; CDC46                                       |  |  |  |
| Q7Z406      | MYH14_HUMAN | Myosin-14                                                 |  |  |  |  | MYH14; KIAA2034; FP17425                          |  |  |  |
| P53621      | COPA_HUMAN  | Coatomer subunit alpha                                    |  |  |  |  | COPA                                              |  |  |  |

|        |             |                                                                     |                                       |
|--------|-------------|---------------------------------------------------------------------|---------------------------------------|
| Q96EY7 | PTCD3_HUMAN | Pentatricopeptide repeat domain-containing protein 3, mitochondrial | PTCD3; MRPS39; TRG15                  |
| P49736 | MCM2_HUMAN  | DNA replication licensing factor MCM2                               | MCM2; BM28; CCNL1; CDCL1; KIAA0030    |
| P14678 | RSMB_HUMAN  | Small nuclear ribonucleoprotein-associated proteins B and B'        | SNRPB; COD SNRPB1                     |
| Q14103 | HNRPD_HUMAN | Heterogeneous nuclear ribonucleoprotein D0                          | HNRNPD; AUF1; HNRPD                   |
| Q1KMD3 | HNRL2_HUMAN | Heterogeneous nuclear ribonucleoprotein U-like protein 2            | HNRNPUL2; HNRPUL2                     |
| Q92598 | HS105_HUMAN | Heat shock protein 105 kDa                                          | HSPH1; HSP105; HSP110; KIAA0201       |
| Q16891 | MIC60_HUMAN | MICOS complex subunit MIC60                                         | IMMT; HMP; MIC60; MINOS2; PIG4; PIG52 |
| Q9UKM9 | RALY_HUMAN  | RNA-binding protein Raly                                            | RALY; HNRPCL2; P542                   |
| Q00839 | HNRPU_HUMAN | Heterogeneous nuclear ribonucleoprotein U                           | HNRNPU; C1orf199; HNRPU; SAFA; U21.1  |
| Q00610 | CLH1_HUMAN  | Clathrin heavy chain 1                                              | CLTC; CLH17; CLTCL2; KIAA0034         |
| P05141 | ADT2_HUMAN  | ADP/ATP translocase 2                                               | SLC25A5; ANT2                         |
| Q15424 | SAFB1_HUMAN | Scaffold attachment factor B1                                       | SAFB; HAP; HET; SAFB1                 |
| Q99623 | PHB2_HUMAN  | Prohibitin-2                                                        | PHB2; BAP; REA                        |
| Q15020 | SART3_HUMAN | Squamous cell carcinoma antigen recognized by T-cells 3             | SART3; KIAA0156; TIP110               |
| P43243 | MATR3_HUMAN | Matrin-3                                                            | MATR3; KIAA0723                       |
| Q96JB2 | COG3_HUMAN  | Conserved oligomeric Golgi complex subunit 3                        | COG3; SEC34                           |
| P51398 | RT29_HUMAN  | 28S ribosomal protein S29, mitochondrial                            | DAP3; MRPS29                          |
| Q9H993 | ARMT1_HUMAN | Damage-control phosphatase ARMT1                                    | ARMT1; C6orf211                       |
| Q9NVP1 | DDX18_HUMAN | ATP-dependent RNA helicase DDX18                                    | DDX18; cPERP-D                        |
| O75396 | SC22B_HUMAN | Vesicle-trafficking protein SEC22b                                  | SEC22B; SEC22L1                       |
| O75340 | PDCD6_HUMAN | Programmed cell death protein 6                                     | PDCD6; ALG2                           |
| P42766 | RL35_HUMAN  | 60S ribosomal protein L35                                           | RPL35                                 |
| P14866 | HNRPL_HUMAN | Heterogeneous nuclear ribonucleoprotein L                           | HNRNPL; HNRPL; P/OKcl.14              |
| Q92841 | DDX17_HUMAN | Probable ATP-dependent RNA helicase DDX17                           | DDX17                                 |
| P53007 | TXTP_HUMAN  | Tricarboxylate transport protein, mitochondrial                     | SLC25A1; SLC20A3                      |
| P35268 | RL22_HUMAN  | 60S ribosomal protein L22                                           | RPL22                                 |
| Q92616 | GCN1_HUMAN  | eIF-2-alpha kinase activator GCN1                                   | GCN1; GCN1L1; KIAA0219                |
| Q8WUM4 | PDC6I_HUMAN | Programmed cell death 6-interacting protein                         | PDCD6IP; AIP1; ALIX; KIAA1375         |
| O94832 | MYO1D_HUMAN | Unconventional myosin-Id                                            | MYO1D KIAA0727                        |
| P84098 | RL19_HUMAN  | 60S ribosomal protein L19                                           | RPL19                                 |
| P36542 | ATPG_HUMAN  | ATP synthase subunit gamma, mitochondrial                           | ATP5F1C; ATP5C; ATP5C1; ATP5CL1       |
